# Supplementary material for: Sustainable synthesis of azobenzenes, quinolines and quinoxalines via oxidative dehydrogenative couplings catalysed by reusable transition metal oxide–Bi(iii) cooperative catalysts
Source: Royal Society of Chemistry journal article supplement (doi:10.1039/d3cy00327b), 2023-01-01
Supplement: d3cy00327b1.pdf [file d3cy00327b1.pdf]

## Supplementary information

# Sustainable synthesis of azobenzenes, quinolines and quinoxalines *via* oxidative dehydrogenative couplings catalysed by reusable transition metal oxide–Bi(III) cooperative catalysts

Marianna Kocsis,<sup>a</sup> Kornélia Baán,<sup>b</sup> Sándor B. Ötvös,<sup>c</sup> Ákos Kukovecz,<sup>b</sup> Zoltán Kónya,<sup>b</sup>  
Pál Sipos,<sup>d</sup> ©István Pálinkó<sup>a</sup> and Gábor Varga<sup>e\*</sup>¥

<sup>a</sup>Department of Organic Chemistry and Materials and Solution Structure Research Group, University of Szeged, Dóm tér 8, Szeged, H-6720 Hungary

<sup>b</sup>Department of Applied and Environmental Chemistry and Interdisciplinary Excellence Centre, Institute of Chemistry, University of Szeged, Rerrich Béla tér 1, Szeged, H-6720 Hungary

<sup>c</sup>Institute of Chemistry, University of Graz, NAWI Graz, Heinrichstrasse 28, Graz, A-8010 Austria

<sup>d</sup>Department of Inorganic and Analytical Chemistry and Materials and Solution Structure Research Group, University of Szeged, Dóm tér 7, Szeged, H-6720 Hungary

<sup>e</sup>Department of Physical Chemistry and Materials Science and Materials and Solution Structure Research Group, University of Szeged, Rerrich Béla tér 1, Szeged, H-6720 Hungary

\*Corresponding author: **G. Varga** ([gabor.varga5@chem.u-szeged.hu](mailto:gabor.varga5@chem.u-szeged.hu))

© passed away

¥ Present address: Australian Institute for Bioengineering and Nanotechnology, The University of Queensland, Brisbane, QLD 4072, Australia

## SECTION S1.

### Supporting results and comparative data

**Table S1** The compositions of the as-prepared bismutite supported composites.

| <b>Composites</b>                                | <b>Bulk composition*</b>                                                                      | <b>Specific surface area<br/>(m<sup>2</sup>/g)**</b> |
|--------------------------------------------------|-----------------------------------------------------------------------------------------------|------------------------------------------------------|
| Bi <sub>2</sub> O <sub>2</sub> CO <sub>3</sub>   | (BiO) <sub>2</sub> (CO <sub>3</sub> ) <sub>0.93</sub> (OH) <sub>0.28</sub>                    | 32                                                   |
| CoBi <sub>2</sub> O <sub>2</sub> CO <sub>3</sub> | Co <sub>0.16</sub> (BiO) <sub>2</sub> (CO <sub>3</sub> ) <sub>1.04</sub> (OH) <sub>1.04</sub> | 48                                                   |
| MnBi <sub>2</sub> O <sub>2</sub> CO <sub>3</sub> | Mn <sub>0.28</sub> (BiO) <sub>2</sub> (CO <sub>3</sub> ) <sub>1.02</sub> (OH) <sub>0.36</sub> | 38                                                   |
| NiBi <sub>2</sub> O <sub>2</sub> CO <sub>3</sub> | Ni <sub>0.69</sub> (BiO) <sub>2</sub> (CO <sub>3</sub> ) <sub>1.02</sub> (OH) <sub>3.94</sub> | 44                                                   |

\*Determined by the combination of ICP-MS and TG measurement

\*\*Determined by BET measurements

**Table S2** Optimisation procedure of the bismutite-based catalysts promoted oxidative dehydrogenative homocoupling of aniline. Reaction conditions: 0.5 ml solvent, T = 64–175 °C for 12–72h and 10 mol% catalyst; c (aniline) = 0.6 M (when using other solvents than aniline).

| Numbers | Composites                                         | Solvent         | Temperature (°C) | Catalyst loading (mol%) | Reaction time (h) | Aniline conversion (mol%) | Azobenzene selectivity (mol%) | Azobenzene yield (mol%) |
|---------|----------------------------------------------------|-----------------|------------------|-------------------------|-------------------|---------------------------|-------------------------------|-------------------------|
| 1       | —                                                  | DMSO            | 150              | —                       | 72                | 3                         | —                             | —                       |
| 2       | Bi <sub>2</sub> O <sub>2</sub> CO <sub>3</sub>     | DMSO            | 150              | 10                      | 72                | 7                         | 90                            | 6                       |
| 3       | MnBi <sub>2</sub> O <sub>2</sub> CO <sub>3</sub>   | DMSO            | 150              | 10                      | 72                | 29                        | 100                           | 29                      |
| 4       | CoBi <sub>2</sub> O <sub>2</sub> CO <sub>3</sub>   | DMSO            | 150              | 10                      | 72                | 19                        | 100                           | 19                      |
| 5       | NiBi <sub>2</sub> O <sub>2</sub> CO <sub>3</sub>   | DMSO            | 150              | 10                      | 72                | 14                        | 100                           | 14                      |
| 6       | MnBi <sub>2</sub> O <sub>2</sub> CO <sub>3</sub> * | DMSO            | 150              | 10                      | 72                | 2                         | 100                           | 2                       |
| 7       | MnBi <sub>2</sub> O <sub>2</sub> CO <sub>3</sub>   | DMSO            | 110              | 10                      | 72                | 9                         | 100                           | 12                      |
| 8       | MnBi <sub>2</sub> O <sub>2</sub> CO <sub>3</sub>   | DMSO            | 175              | 10                      | 72                | 30                        | 100                           | 30                      |
| 9       | MnBi <sub>2</sub> O <sub>2</sub> CO <sub>3</sub>   | methanol        | reflux           | 10                      | 72                | 5                         | 100                           | 5                       |
| 10      | MnBi <sub>2</sub> O <sub>2</sub> CO <sub>3</sub>   | toluene         | reflux           | 10                      | 72                | 20                        | 75                            | 15                      |
| 11      | MnBi <sub>2</sub> O <sub>2</sub> CO <sub>3</sub>   | acetonitrile    | reflux           | 10                      | 72                | —                         | —                             | —                       |
| 12      | MnBi <sub>2</sub> O <sub>2</sub> CO <sub>3</sub>   | γ-valerolactone | reflux           | 10                      | 72                | 15                        | 100                           | 15                      |
| 13      | MnBi <sub>2</sub> O <sub>2</sub> CO <sub>3</sub>   | —               | 150              | 10                      | 72                | 71                        | 100                           | 71                      |
| 14      | MnBi <sub>2</sub> O <sub>2</sub> CO <sub>3</sub>   | —               | reflux           | 10                      | 72                | 73                        | 96                            | 70                      |
| 15      | MnBi <sub>2</sub> O <sub>2</sub> CO <sub>3</sub>   | —               | 110              | 10                      | 72                | 35                        | 80                            | 28                      |
| 16      | MnBi <sub>2</sub> O <sub>2</sub> CO <sub>3</sub>   | —               | 150              | 5                       | 72                | 49                        | 90                            | 44                      |
| 17      | MnBi <sub>2</sub> O <sub>2</sub> CO <sub>3</sub>   | —               | 150              | 20                      | 72                | 79                        | 97                            | 77                      |
| 18      | MnBi <sub>2</sub> O <sub>2</sub> CO <sub>3</sub>   | —               | 150              | 10                      | 48                | 34                        | 100                           | 34                      |
| 19      | MnBi <sub>2</sub> O <sub>2</sub> CO <sub>3</sub>   | —               | 150              | 10                      | 24                | 16                        | 100                           | 16                      |
| 20      | CoBi <sub>2</sub> O <sub>2</sub> CO <sub>3</sub>   | —               | 150              | 10                      | 48                | 75                        | 100                           | 75                      |
| 21      | CoBi <sub>2</sub> O <sub>2</sub> CO <sub>3</sub>   | —               | 150              | 10                      | 24                | 51                        | 100                           | 51                      |
| 22      | CoBi <sub>2</sub> O <sub>2</sub> CO <sub>3</sub>   | —               | 150              | 10                      | 12                | 23                        | 100                           | 23                      |
| 23      | CoBi <sub>2</sub> O <sub>2</sub> CO <sub>3</sub>   | —               | 150              | 5                       | 72                | 48                        | 100                           | 48                      |
| 24      | CoBi <sub>2</sub> O <sub>2</sub> CO <sub>3</sub>   | —               | 150              | 2.5                     | 72                | 12                        | 100                           | 12                      |

**Table S3** Selectivity test of the as-prepared  $\text{CoBi}_2\text{O}_2\text{CO}_3$  catalyst in oxidative dehydrogenative heterocoupling of aniline derivatives. Reaction conditions: 0.5 ml solvent,  $T = 150\text{ }^\circ\text{C}$  for 72h and 10 mol% catalyst;  $c(\text{aniline}) = 0.6\text{ M}$ ,  $c(\text{substituted aniline}) = 0.5\text{ M}$ .

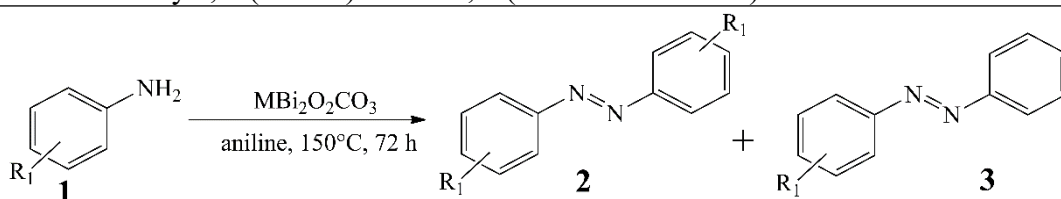

|                  | Solvent | Temperature (°C) | Catalyst loading (mol%) | Reaction time (h) | Conversion of 1 (mol%) | Selectivity of 3 (mol%) | Yield of 3 (mol%) |
|------------------|---------|------------------|-------------------------|-------------------|------------------------|-------------------------|-------------------|
| R= <i>o</i> -OMe | DMSO    | 150              | 10                      | 72                | 17                     | 88                      | 15                |
| R= <i>p</i> -Br  | DMSO    | 150              | 10                      | 72                | 28                     | 96                      | 27                |
| R= <i>p</i> -Me  | DMSO    | 150              | 10                      | 72                | 25                     | 95                      | 24                |
| R= <i>o</i> -OMe | toluene | reflux           | 10                      | 72                | 51                     | 90                      | 46                |
| R= <i>p</i> -Br  | toluene | reflux           | 10                      | 72                | 54                     | 96                      | 52                |
| R= <i>p</i> -Me  | toluene | reflux           | 10                      | 72                | 54                     | 92                      | 50                |

**Table S4** Comparative table of the catalytic ability of the as-prepared  $\text{CoBi}_2\text{O}_2\text{CO}_3$  catalyst and the benchmark catalysts for the oxidative dehydrogenative homo- and heterocoupling of different anilines.

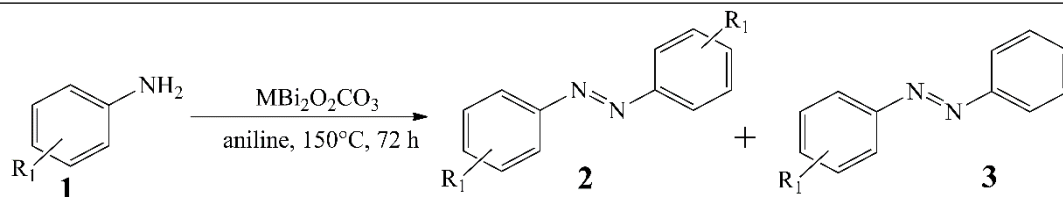

| Catalyst                             | Solvent | Temperature ( $^\circ\text{C}$ ) | Catalyst loading (mol%) | Reaction time (h) | Additive         | Atmosphere         | Aniline conversion (mol%) | Selectivity of <b>3</b> (mol%) | Yield of <b>3</b> (mol%) | References |
|--------------------------------------|---------|----------------------------------|-------------------------|-------------------|------------------|--------------------|---------------------------|--------------------------------|--------------------------|------------|
| $\text{CoBi}_2\text{O}_2\text{CO}_3$ | —       | 150                              | 10                      | 72                | —                | air                | 35–100                    | 75–100                         | 34–95                    | This work  |
| $\text{CuBr}_2$                      | toluene | 60                               | 20                      | 24                | 60 mol% pyridine | 1 bar $\text{O}_2$ | 60–100                    | 50–100                         | 42–69                    | 1          |
| meso- $\text{Mn}_2\text{O}_3$        | toluene | 110                              | 32                      | 12                | —                | air                | 80–100                    | 28–92                          | 28–87                    | 2          |

**Table S5** Comparative table of the catalytic ability of the as-prepared  $\text{CoBi}_2\text{O}_2\text{CO}_3$  catalyst and the benchmark catalysts for the oxidative dehydrogenative couplings for the synthesis of quinolines.

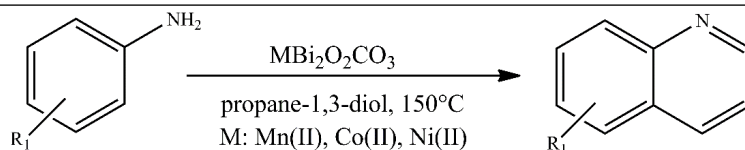

| Catalyst                                         | Solvent     | Temperature (°C) | Catalyst loading (mol%) | Reaction time (h) | Additive                                                 | Atmosphere               | Aniline conversion (mol%) | Selectivity of dp (mol%) | Yield of dp (mol%) | References |
|--------------------------------------------------|-------------|------------------|-------------------------|-------------------|----------------------------------------------------------|--------------------------|---------------------------|--------------------------|--------------------|------------|
| $\text{CoBi}_2\text{O}_2\text{CO}_3$             | —           | 150              | 10                      | 48                | —                                                        | air                      | 92–100                    | 65–100                   | 65–100             | This work  |
| $\text{RuCl}_3 \times n\text{H}_2\text{O}$       | mesitylene  | 164              | 5                       | 16                | 10 mol% phosphine, 5% $\text{MgBr}_2 \cdot \text{OEt}_2$ | argon                    | 20–61                     | 100                      | 20–61              | 3          |
| $\text{Pt}/\text{Al}_2\text{O}_3$ + $\text{ZnO}$ | NMP         | 175              | 1.7 + 4.5               | 16–45             | 5% p-TSA* $\text{H}_2\text{O}$                           | argon                    | 15–70                     | 80–100                   | 18–62              | 4          |
| $(\text{Pd}(\text{OAc})_2)$                      | —           | 150              | 5                       | 16                | 10 mol% ligand + 20 mol% acid                            | oxygen                   | 55–82                     | 100                      | 55–82              | 5          |
| Mn(I)-PNP                                        | toluene     | 140*             | 5                       | 24                | 210 mol% t-BuOK; 100 mol% KOH                            | pressured gas + argon    | 61–91                     | 100                      | 61–91              | 6          |
| Co(II)-PNP                                       | toluene     | 120*             | 2                       | 24                | 5 mol% t-BuOK; 2 mol%                                    | pressured gas + argon    | 38–65                     | 100                      | 38–65              | 7          |
| Knölker-Fe                                       | toluene     | 140*             | 2                       | 48                | $\text{PPh}_3$ + 10–30 mol% t-BuOK                       | pressured gas            | 55–67                     | 100                      | 55–67              | 8          |
| Mn(I)-NNN                                        | toluene     | 130*             | 2                       | 20                | 100 mol% t-BuOK                                          | pressured gas + nitrogen | 60–75                     | 100                      | 60–75              | 9          |
| $[\text{Ni}(\text{II})(\text{MeTAA})]$           | toluene     | 90               | 8                       | 36                | 200 mol% t-BuOK                                          | air                      | 32–83                     | 100                      | 32–83              | 10         |
| Ni(II)-NNNN                                      | toluene     | 135*             | 2                       | 24                | 100 mol% t-BuOK                                          | pressured gas + argon    | 46–88                     | 100                      | 46–88              | 11         |
| Ni(II)-NNNN                                      | toluene     | 80               | 4                       | 10–30             | 50 mol% t-BuOK                                           | air                      | 49–90                     | 100                      | 49–90              | 12         |
| Cu(II)-NNN**                                     | toluene     | 85               | 1                       | 18                | 50 mol% NaOH                                             | air                      | 40–96                     | 100                      | 40–96              | 13         |
| SNS-Co(II)                                       | m-xylene    | 139              | 2.5                     | 24                | 110 mol% t-BuOK                                          | argon                    | 63–57                     | 100                      | 63–87              | 14         |
| Co(II)-NNN                                       | toluene     | 150*             | 5                       | 12                | 100 mol% $\text{CsOH} \times \text{H}_2\text{O}$         | pressured gas + argon    | 55–93                     | 100                      | 55–93              | 15         |
| Mn(II)-NNN                                       | toluene     | 120*             | 5                       | 24                | 75 mol% KOH                                              | pressured gas            | 35–90                     | 100                      | 35–90              | 16         |
| Ru(II)-PCy <sub>3</sub>                          | 1,4-dioxane | 80               | 1                       | 1                 | 100 mol% KOH                                             | argon                    | 22–100                    | 100                      | 22–100             | 17         |
| Re(I)-PN(H)P                                     | toluene     | 150*             | 1                       | 24                | 10 mol% t-BuOK                                           | pressured gas + argon    | 87–98                     | 90–96                    | 87–96              | 18         |
| Organo-Ru(II)-NNN                                | toluene     | 100              | 0.01                    | 6                 | 15 mol% KOH                                              | argon                    | 72–98                     | 100                      | 72–98              | 19         |

\*over boiling point; \*\*  $\text{H}_2\text{O}_2$  waste; dp: desired product

yellow background: amino benzyl alcohols + ketones/alcohols

orange background: anilines + diols (alcohols)

**Table S6** Some variations in the reaction conditions of oxidative dehydrogenative heterocoupling of o-phenylenediamines and ethylene-glycol. Applied reaction conditions: 1 equiv. (0.25 M) o-phenylenediamines or its derivatives, ethylene-glycol of 2 ml, 110 °C for 24h and 10 mol% catalyst.

$\text{M(II)(BiO)}_2\text{CO}_3$   
 ethylene-glycol, 110 °C, 24h

| R-group | Composites                                       | Temperature (°C) | Catalyst loading (mol%) | Reaction time (h) | Aniline conversion (mol%) | Selectivity of dp (mol%) | Yield of dp (mol%) |
|---------|--------------------------------------------------|------------------|-------------------------|-------------------|---------------------------|--------------------------|--------------------|
| H       | MnBi <sub>2</sub> O <sub>2</sub> CO <sub>3</sub> | 110              | 10                      | 24                | 100                       | 100                      | 100                |
| p-Br    |                                                  |                  |                         |                   | 60                        | 100                      | 60                 |
| p-Cl    |                                                  |                  |                         |                   | 73                        | 41                       | 30                 |
| p-nitro |                                                  |                  |                         |                   | 11                        | 100                      | 11                 |
| p-COOH  |                                                  |                  |                         |                   | 100                       | 19                       | 19                 |
| p-Me    |                                                  |                  |                         |                   | 58                        | 100                      | 58                 |
| H       | CoBi <sub>2</sub> O <sub>2</sub> CO <sub>3</sub> | 110              | 2.5                     | 24                | 100                       | 100                      | 100                |
| p-Br    |                                                  |                  |                         |                   | 66                        | 100                      | 66                 |
| p-Cl    |                                                  |                  |                         |                   | 45                        | 76                       | 34                 |
| p-nitro |                                                  |                  |                         |                   | 99                        | 100                      | 99                 |
| p-COOH  |                                                  |                  |                         |                   | 100                       | 50                       | 50                 |
| p-Me    |                                                  |                  |                         |                   | 55                        | 100                      | 55                 |
| H       | CoBi <sub>2</sub> O <sub>2</sub> CO <sub>3</sub> | 110              | 10                      | 24                | 100                       | 100                      | 100                |
| p-Br    |                                                  |                  |                         |                   | 93                        | 100                      | 93                 |
| p-Cl    |                                                  |                  |                         |                   | 86                        | 86                       | 74                 |
| p-nitro |                                                  |                  |                         |                   | 100                       | 100                      | 100                |
| p-COOH  |                                                  |                  |                         |                   | 100                       | 78                       | 78                 |
| p-Me    |                                                  |                  |                         |                   | 95                        | 100                      | 95                 |
| H       | CoBi <sub>2</sub> O <sub>2</sub> CO <sub>3</sub> | 90               | 10                      | 24                | 100                       | 89                       | 89                 |
| p-Br    |                                                  |                  |                         |                   | 93                        | 80                       | 75                 |
| p-Cl    |                                                  |                  |                         |                   | 79                        | 65                       | 51                 |
| p-nitro |                                                  |                  |                         |                   | 100                       | 85                       | 85                 |
| p-COOH  |                                                  |                  |                         |                   | 95                        | 60                       | 57                 |
| p-Me    |                                                  |                  |                         |                   | 90                        | 82                       | 74                 |

**dp:** desired product

**Table S7** Comparative table of the catalytic ability of the as-prepared  $\text{CoBi}_2\text{O}_2\text{CO}_3$  catalyst and the benchmark catalysts for the oxidative dehydrogenative couplings for the synthesis of quinoxalines.

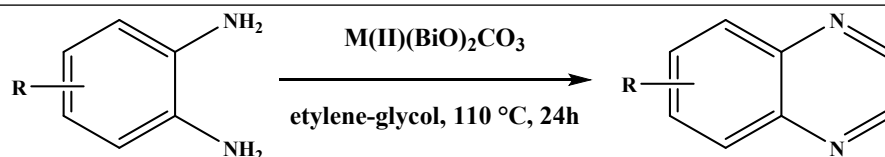

| Catalyst                                           | Solvent          | Temperature (°C) | Catalyst loading (mol%) | Reaction time (h) | Additive                                                | Atmosphere               | Aniline conversion (mol%) | Selectivity of dp (mol%) | Yield of dp (mol%) | References       |
|----------------------------------------------------|------------------|------------------|-------------------------|-------------------|---------------------------------------------------------|--------------------------|---------------------------|--------------------------|--------------------|------------------|
| $\text{CoBi}_2\text{O}_2\text{CO}_3$               | —                | 110              | 10                      | 24                | —                                                       | air                      | 86–100                    | 78–100                   | 78–100             | <i>This work</i> |
| Mn(I)–PNP                                          | toluene          | 150*             | 2                       | 36                | 3–100 mol% KH                                           | argon                    | 45–99                     | 50–98                    | 35–95              | 20               |
| Mn(I)–NNS                                          | —                | 140              | 4                       | 20                | 27 mol% KOH                                             | argon                    | 53–82                     | 100                      | 53–82              | 21               |
| Mn(I)(CO) <sub>5</sub> Br                          | toluene          | 130*             | 2                       | 36                | 3 mol% ligand + 40 mol% t-BuOK                          | argon                    | 43–83                     | 100                      | 43–83              | 22               |
| Co(OAc) <sub>2</sub> -Phen/Carbon-800              | toluene          | 150*             | 1.5                     | 24–36             | 75 mol% CsOH×H <sub>2</sub> O                           | argon                    | 64–96                     | 100                      | 64–96              | 23               |
| NiBr <sub>2</sub>                                  | toluene          | 110              | 5                       | 24                | 50 mol% Cs <sub>2</sub> CO <sub>3</sub> + 5 mol% ligand | argon                    | 79–98                     | 90–100                   | 70–98              | 24               |
| Ni(II)–NNOO                                        | toluene          | 80               | 5                       | 8                 | 50 mol% t-BuOK                                          | oxygen                   | 70–92                     | 100                      | 70–92              | 25               |
| Co(II)–NNN                                         | toluene          | 150*             | 5                       | 24                | 120 mol% CsOH×H <sub>2</sub> O                          | pressured gas + argon    | 70–93                     | 100                      | 75–93              | 15               |
| RuCl <sub>2</sub> (PPh <sub>3</sub> ) <sub>3</sub> | diglyme          | 162              | 4                       | 20                | 400 mol% KOH                                            | air                      | 63–82                     | 100                      | 63–82              | 26               |
| Ir–P <sup>^</sup> N <sup>^</sup> P                 | THF              | 90*              | 0.06                    | 24                | 200 mol% t-BuOK                                         | pressured gas + nitrogen | 61–89                     | 100                      | 61–89              | 27               |
| Re(I)–PNP                                          | toluene          | 120*             | 0.05                    | 6                 | 50 mol% t-BuOK                                          | argon                    | 67–85                     | 100                      | 67–85              | 28               |
| organo-Ir–NNO                                      | H <sub>2</sub> O | 120*             | 2.5                     | 24                | 150 mol% KOH                                            | argon                    | 69–88                     | 90–98                    | 65–84              | 29               |
| Ru <sub>3</sub> (CO) <sub>12</sub>                 | toluene          | 150*             | 1                       | 8                 | 50 mol% CsOH×H <sub>2</sub> O + 3 mol% DPPH             | nitrogen                 | 36–84                     | 100                      | 36–84              | 30               |
| Au/CeO <sub>2</sub>                                | diglyme          | 140              | 1                       | 24–30             | —                                                       | air                      | 94–99                     | 35–92                    | 35–91              | 31               |

\*over boiling point; **green background**; reusable; **dp**: desired product



**Table S8** Oxidative dehydrogenative heterocoupling of o-phenylenediamines and ethylene glycol. Reaction conditions: 1 equiv. (0.25 M) o-phenylenediamine or its substituted derivative, 2 mL ethylene glycol, 110 °C for 24h and 10 mol% catalyst.

| 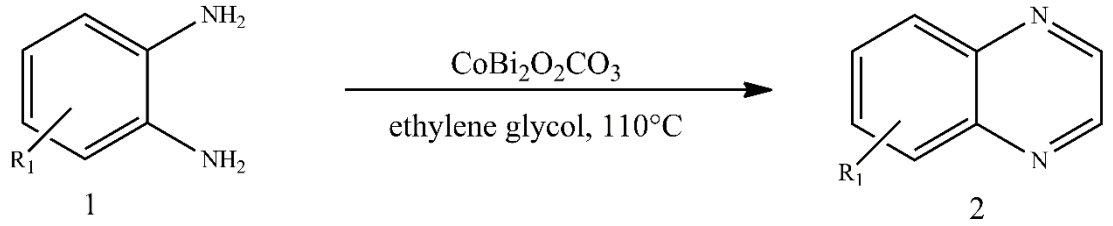 |                   |                    |          |
|------------------------------------------------------------------------------------|-------------------|--------------------|----------|
| Desired product                                                                    | Yield of 2 (mol%) | Isolated yield (%) | E-factor |
| R <sub>1</sub> = H                                                                 | 100*              | 85                 | 2.1      |
| R <sub>1</sub> = 4-Br                                                              | 93                | 80                 | 2.9      |
| R <sub>1</sub> = 4-Cl                                                              | 74                | 63                 | 5.6      |
| R <sub>1</sub> = 4-COOH                                                            | 78                | 64                 | 4.9      |
| R <sub>1</sub> = 4-Me                                                              | 95                | 84                 | 3.4      |
| R <sub>1</sub> = 4-nitro                                                           | 99*               | 85                 | 2.1      |

\* 2.5 mol% catalyst, E - factor = the mass of waste (mg)/the mass of product (mg)

waste = by-product (mg) + leftover reactant (mg)+ solvent losses (mg)

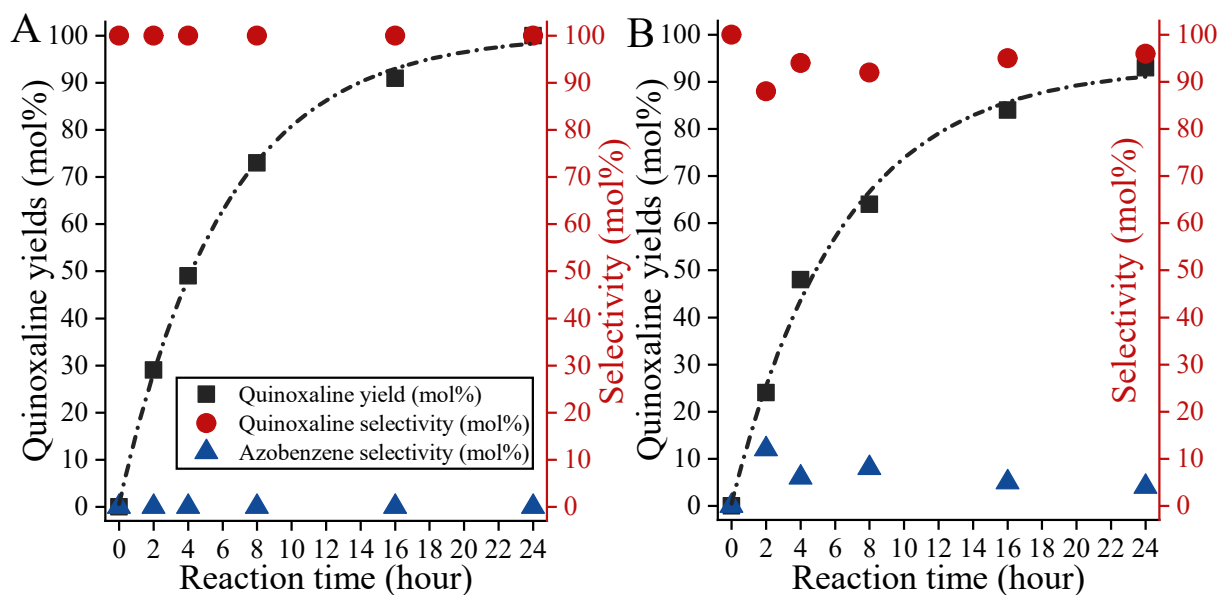

**Fig. S1** Catalytic stability test of the CoBi<sub>2</sub>O<sub>2</sub>CO<sub>3</sub> composite. Quinoxaline yields, quinoxaline selectivity and azobenzene selectivity as a function of time in a catalytic reaction of *o*-phenylenediamine and ethylene glycol catalysed by CoBi<sub>2</sub>O<sub>2</sub>CO<sub>3</sub> in first (A) and fifth (B) reaction cycle. Reaction conditions: 1 equiv. (0.25 M) *o*-phenylenediamine, 2 mL ethylene glycol and 2.5 mol% catalyst at 110°C.

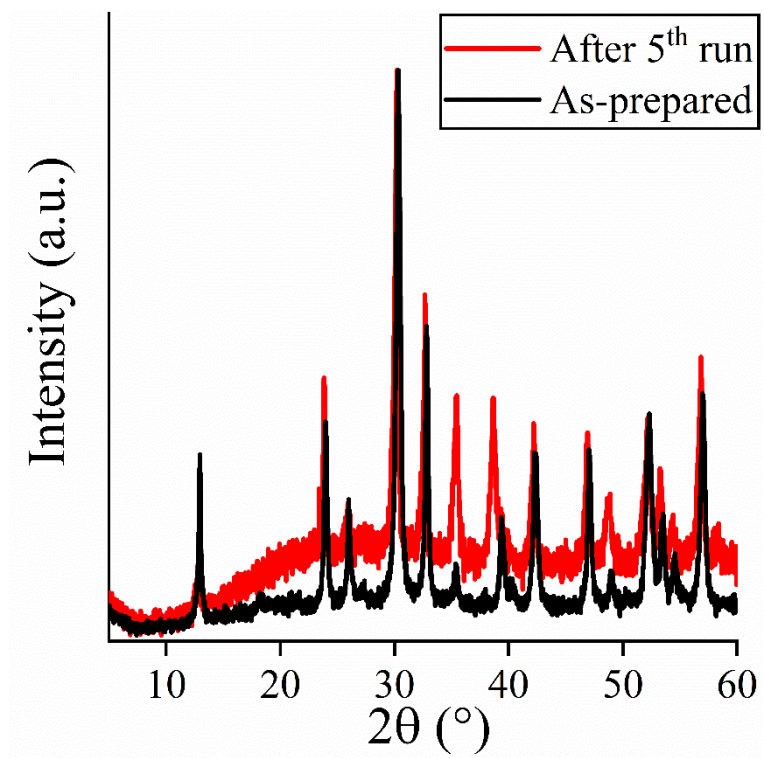

**Fig. S2** XRD patterns of  $\text{CoBi}_2\text{O}_2\text{CO}_3$  composite before and after the recycling test.

## SECTION S2.

### Identification of the produced azobenzene, quinoline, quinoxaline and their derivatives by NMR spectroscopy

#### Azobenzene

$^1\text{H}$  NMR (500 MHz, DMSO- $d_6$ )  $\delta$  7.63-7.57 (m, 1H), 7.52-7.45 (m, 1H), 7.45-7.38 (m, 1H).

$^{13}\text{C}$  NMR (125 MHz, DMSO- $d_6$ )  $\delta$  153.03, 129.94, 129.12, 122.06.

#### 1,2-bis(4-methoxyphenyl)diazene

$^1\text{H}$  NMR (500 MHz, DMSO- $d_6$ )  $\delta$  7.66-7.60 (m, 1H), 7.04-6.98 (m, 1H), 3.76 (s, 6H).

$^{13}\text{C}$  NMR (100 MHz, DMSO- $d_6$ )  $\delta$  160.73, 147.10, 124.02, 114.57, 55.33.

#### 1-(4-methoxyphenyl)-2-phenyldiazene

$^1\text{H}$  NMR (500 MHz, DMSO- $d_6$ )  $\delta$  7.66-7.57 (m, 4H), 7.52-7.45 (m, 2H), 7.45-7.38 (m, 1H), 7.04 – 6.98 (m, 2H), 3.76 (s, 3H).

$^{13}\text{C}$  NMR (100 MHz, DMSO- $d_6$ )  $\delta$  160.73, 152.32, 147.10, 129.94, 129.12, 124.02, 122.09, 114.57, 55.33.

#### 1,2-bis(2-methoxyphenyl)diazene

$^1\text{H}$  NMR (500 MHz, DMSO- $d_6$ )  $\delta$  7.73 (dd, 1H), 7.35 (dd, 1H), 7.13 (q, 2H), 3.85 (s, 3H).

$^{13}\text{C}$  NMR (100 MHz, DMSO- $d_6$ )  $\delta$  153.01, 143.50, 128.22, 125.05, 122.30, 114.39, 56.15.

#### 1-(2-methoxyphenyl)-2-phenyldiazene

$^1\text{H}$  NMR (500 MHz, DMSO- $d_6$ )  $\delta$  7.77 (dd, 1H), 7.63-7.57 (m, 2H), 7.52-7.45 (m, 2H), 7.45-7.38 (m, 1H), 7.33 (t, 1H), 7.14 (t, 1H), 7.10 (dd, 1H), 3.85 (s, 3H).

$^{13}\text{C}$  NMR (100 MHz, DMSO- $d_6$ )  $\delta$  152.92, 151.96, 143.22, 129.94, 129.55, 128.22, 124.08, 122.30, 122.18, 114.39, 56.15.

#### 1,2-bis(3-nitrophenyl)diazene

$^1\text{H}$  NMR (500 MHz, DMSO- $d_6$ )  $\delta$  8.64 (t, 1H), 8.32-8.26 (m, 1H), 7.81-7.75 (m, 1H), 7.69 (dd, 1H).

$^{13}\text{C}$  NMR (100 MHz, DMSO- $d_6$ )  $\delta$  152.16, 147.25, 129.06, 127.30, 123.00, 116.59.

#### 1-(3-nitrophenyl)2-phenyldiazene

$^1\text{H}$  NMR (500 MHz, DMSO- $d_6$ )  $\delta$  8.63 (t, 1H), 8.32- 8.26 (m, 1H), 7.80-7.75 (m, 1H), 7.72 - 7.65 (m, 1H), 7.63-7.57 (m, 2H), 7.52-7.45 (m, 2H), 7.45-7.38 (m, 1H).

$^{13}\text{C}$  NMR (100 MHz, DMSO- $d_6$ )  $\delta$  152.60, 152.13, 147.25, 129.94, 129.12, 129.06, 127.30, 123.00, 122.65, 116.58.

#### 1,2-bis(4-bromophenyl)diazene

$^1\text{H}$  NMR (500 MHz, DMSO- $d_6$ )  $\delta$  7.73-7.67 (m, 1H), 7.63-7.57 (m, 1H).

$^{13}\text{C}$  NMR (125 MHz, DMSO- $d_6$ )  $\delta$  151.90, 132.06, 123.25, 122.26.

#### 1-(4-bromophenyl)-2-phenyldiazene

$^1\text{H}$  NMR (500 MHz, DMSO- $d_6$ )  $\delta$  7.73-7.67 (m, 2H), 7.63- 7.57 (m, 4H), 7.52- 7.45 (m, 2H), 7.45- 7.38 (m, 1H).

$^{13}\text{C}$  NMR (125 MHz, DMSO- $d_6$ )  $\delta$  152.32, 151.90, 132.06, 129.94, 129.12, 123.25, 122.26, 122.06.

1,2-bis(4-chlorophenyl)diazene

$^1\text{H}$  NMR (500 MHz, DMSO- $d_6$ )  $\delta$  7.79- 7.73 (m, 1H), 7.50- 7.44 (m, 1H).

$^{13}\text{C}$  NMR (100 MHz, DMSO- $d_6$ )  $\delta$  151.15, 133.73, 128.90, 122.63.

1-(4-chlorophenyl)-2-phenyldiazene

$^1\text{H}$  NMR (500 MHz, DMSO- $d_6$ )  $\delta$  7.79-7.73 (m, 1H), 7.63-7.57 (m, 1H), 7.52- 7.38 (m, 2H).

$^{13}\text{C}$  NMR (100 MHz, DMSO- $d_6$ )  $\delta$  152.32, 151.15, 133.73, 129.94, 129.12, 128.90, 122.60, 122.09.

1,2-di-p-tolyldiazene

$^1\text{H}$  NMR (500 MHz, DMSO- $d_6$ )  $\delta$  7.61-7.55 (m, 1H), 7.28- 7.22 (m, 1H), 2.36 (s, 6H).

$^{13}\text{C}$  NMR (100 MHz, DMSO- $d_6$ )  $\delta$  149.94, 138.49, 131.06, 116.25, 21.18.

1-phenyl-2-(p-tolyl)diazene

$^1\text{H}$  NMR (500 MHz, DMSO- $d_6$ )  $\delta$  7.59 (t, 4H), 7.52-7.45 (m, 2H), 7.45-7.38 (m, 1H), 7.28-7.22 (m, 2H), 2.36 (s, 3H).

$^{13}\text{C}$  NMR (100 MHz, DMSO- $d_6$ )  $\delta$  152.32, 149.94, 138.49, 131.06, 129.94, 129.12, 122.06, 116.25, 21.18.

4,4'-(diazene-1,2-diyl)dibenzonitrile

$^1\text{H}$  NMR (500 MHz, DMSO- $d_6$ )  $\delta$  7.85-7.76 (m, 1H).

$^{13}\text{C}$  NMR (100 MHz, DMSO- $d_6$ )  $\delta$  155.72, 133.54, 123.23, 118.45, 112.27.

4-(phenyldiazenyl)benzonitrile

$^1\text{H}$  NMR (500 MHz, DMSO- $d_6$ )  $\delta$  7.85 – 7.76 (m, 4H), 7.63 – 7.57 (m, 2H), 7.52 – 7.45 (m, 2H), 7.45 – 7.38 (m, 1H).

$^{13}\text{C}$  NMR (100 MHz, DMSO- $d_6$ )  $\delta$  155.72, 152.32, 133.54, 129.94, 129.12, 123.23, 122.09, 118.45, 112.27.

Quinoline

$^1\text{H}$  NMR (500 MHz, DMSO- $d_6$ )  $\delta$ :8.90 (dd, 1H), 8.36 (dd, 1H), 8.02-7.99 (d, 1H), 7.98-7.97 (d, 1H), 7.63-7.61 (t, 1H), 7.63, 7.52-7.49 (m, 2H)

$^{13}\text{C}$  NMR (100 MHz, DMSO- $d_6$ )  $\delta$ :148.77, 148.05, 131.52, 130.14, 129.36, 128.58, 127.43, 126.15, 121.32.

8-methoxyquinoline

$^1\text{H}$  NMR (500 MHz, DMSO- $d_6$ )  $\delta$  8.83 (dd, 2H), 8.29 (dd, 2H), 7.97-7.91 (m, 2H), 7.51 (dd, 2H), 7.32 (t, 2H), 7.18 (dd, 2H), 3.83 (s, 3H)

$^{13}\text{C}$  NMR (100 MHz, DMSO- $d_6$ )  $\delta$  154.53, 148.72, 139.39, 130.00, 129.75, 128.73, 126.29, 122.48, 113.75, 55.69.

6-methoxyquinoline

$^1\text{H}$  NMR (500 MHz, DMSO- $d_6$ )  $\delta$  8.73 (dd, 2H), 8.24 (d, 2H), 7.91 (d, 2H), 7.51-7.43 (m, 2H), 7.38 (t, 2H), 7.11 (dd, 2H), 3.79 (s, 3H).

$^{13}\text{C}$  NMR (100 MHz, DMSO- $d_6$ )  $\delta$  157.52, 148.24, 143.70, 130.13, 129.96, 128.26, 122.15, 115.12, 105.51, 55.28.

7-nitroquinoline

<sup>1</sup>H NMR (500 MHz, DMSO-*d*<sub>6</sub>) δ 8.87 (d, 1H), 8.61 (dd, 1H), 8.20 (dd, 1H), 8.16-8.07 (m, 2H), 7.51 (dd, 1H).

<sup>13</sup>C NMR (100 MHz, DMSO-*d*<sub>6</sub>) δ 151.01, 148.14, 148.05, 131.61, 128.54, 127.26, 124.39, 122.52, 120.70.

#### 6-cloroquinoline

<sup>1</sup>H NMR (500 MHz, DMSO-*d*<sub>6</sub>) δ 8.93 (dd, 1H), 8.36 (d, 1H), 8.04 (d, 1H), 7.78 (dd, 1H), 7.63 – 7.7.56 (m, 2H).

<sup>13</sup>C NMR (100 MHz, DMSO-*d*<sub>6</sub>) δ 147.83, 146.61, 131.83, 129.90, 129.72, 129.42, 126.34, 123.91, 121.68.

#### 8-methylquinoline

<sup>1</sup>H NMR (500 MHz, DMSO-*d*<sub>6</sub>) δ 8.93 (dd, 1H), 8.33 (dd, 1H), 7.80 (d, 1H), 7.63 (dd, 2H), 7.50 (t, 1H), 2.73 (s, 3H)

<sup>13</sup>C NMR (100 MHz, DMSO-*d*<sub>6</sub>) δ 148.24, 147.03, 132.78, 130.63, 130.30, 129.90, 128.42, 125.74, 121.07, 17.02.

#### 6-methylquinoline

<sup>1</sup>H NMR (500 MHz, DMSO-*d*<sub>6</sub>) δ 8.82 (dd, 1H), 8.23 (dt, 1H), 7.94 (d, 1H), 7.73 (t, 1H), 7.50 – 7.43 (m, 2H), 2.47 (s, 3H).

<sup>13</sup>C NMR (100 MHz, DMSO-*d*<sub>6</sub>) δ 149.29, 147.07, 135.26, 130.63, 130.03, 128.52, 128.05, 127.97, 121.11, 21.55.

#### Quinoxaline

<sup>1</sup>H NMR (500 MHz, DMSO-*d*<sub>6</sub>) δ: 8.96 (s, 2H), 8.11-8.10 (dd, 2H), 7.88-7.86 (dd, 2H).

<sup>13</sup>C NMR (100MHz, DMSO-*d*<sub>6</sub>) δ: 145.55, 144.04, 130.05, 127.01.

#### 6-bromoquinoxaline

<sup>1</sup>H NMR (500 MHz, DMSO-*d*<sub>6</sub>) δ 8.98 (d, 1H), 8.34 (d, 1H), 8.20 (d, 1H), 8.06-8.04, (m 1H) 8.00 (dd, 1H).

<sup>13</sup>C NMR (100 MHz, DMSO-*d*<sub>6</sub>) δ 145.88, 145.33, 142.40, 141.34, 133.71, 129.10, 128.66, 122.32.

#### 6-cloroquinoxaline

<sup>1</sup>H NMR (500 MHz, DMSO-*d*<sub>6</sub>) δ 8.98 (d, 1H), 8.20 (d, 1H), 7.92 (m, 2H) 6.9 (d, 1H)

<sup>13</sup>C NMR (100 MHz, DMSO-*d*<sub>6</sub>) δ: 145.52, 144.95, 143.61, 142.30, 134.30, 130.36, 130.32, 125.51.

#### 6-nitroquinoxaline

<sup>1</sup>H NMR (500 MHz, DMSO-*d*<sub>6</sub>) δ 9.16 (d, 1H), 8.97, (d, 1H), 8.93 (d, 1H), 8.42-8.27 (m, 2H).

<sup>13</sup>C NMR (100 MHz, DMSO-*d*<sub>6</sub>) δ: 147.50, 147.08, 146.90, 144.71, 142.41, 130.89, 123.85, 123.79.

#### quinoxaline-6-carboxylic acid

<sup>1</sup>H NMR (500 MHz, DMSO-*d*<sub>6</sub>) δ: 9.34 (d, 1H), 8.88 (d, 1H), 8.38 (m, 1H) 8.18-8.12 (m, 2H).

<sup>13</sup>C NMR (100 MHz, DMSO-*d*<sub>6</sub>) δ: 167.26, 146.12, 145.33, 145.05, 140.72, 131.47, 128.28, 127.18, 124.81.

#### 6-methylquinoxaline

$^1\text{H}$  NMR (500 MHz,  $\text{DMSO-}d_6$ )  $\delta$  9.00 (d, 1H), 8.87 (d, 1H), 7.97 (d, 1H) 7.87 (d, 1H), 7.71 (d, 1H) 2.56. (s, 3H)

$^{13}\text{C}$  NMR (100 MHz,  $\text{DMSO-}d_6$ )  $\delta$ :144.75, 144.08, 142.32, 141.92, 138.45, 130.48, 127.68, 126.70, 21.05.

7H-dibenzo[c,g][1,2,6]triazonine

$^1\text{H}$  NMR ( $\text{DMSO-}d_6$ )  $\delta$ :8.81 (s, 1H), 8.03-7.99 (m, 2H), 7.53-7.50 (m, 2H), 7.46-7.39 (m, 3H), 7.33- 7.31, (t, 1H), 5.20 (s, 1H).

$^{13}\text{C}$  NMR (100 MHz,  $\text{DMSO-}d_6$ )  $\delta$ :158.24, 152.72, 143.62, 131.56, 130.04, 130.02, 128.68, 128.49, 127.65, 126.77, 126.73, 125.29, 123.60, 61.79.

## NOTES AND REFERENCES

- 1 C. Zhang and N. Jiao, *Angew. Chem. Int. Ed.*, 2010, **49**, 6174–6177.
- 2 B. Dutta, S. Biswas, V. Sharma, N. O. Savage, S. P. Alpay and S. L. Suib, *Angew. Chem.*, 2016, **128**, 2211–2215.
- 3 R. N. Monrad and R. Madsen, *Org. Biomol. Chem.*, 2011, **9**, 610–615.
- 4 D. Bellezza, R. J. Zaragozá, M. José Aurell, R. Ballesteros and R. Ballesteros-Garrido, *Org. Biomol. Chem.*, 2021, **19**, 677–683.
- 5 J. Li, J. Zhang, H. Yang and G. Jiang, *J. Org. Chem.*, 2017, **82**, 3284–3290.
- 6 M. Mastalir, M. Glatz, E. Pittenauer, G. Allmaier and K. Kirchner, *J. Am. Chem. Soc.*, 2016, **138**, 15543–15546.
- 7 G. Zhang, J. Wu, H. Zeng, S. Zhang, Z. Yin and S. Zheng, *Org. Lett.*, 2017, **19**, 1080–1083.
- 8 S. Elangovan, J. Sortais, M. Beller and C. Darcel, *Angew. Chem. Int. Ed.*, 2015, **54**, 14483–14486.
- 9 C. Zhang, B. Hu, D. Chen and H. Xia, *Organometallics*, 2019, **38**, 3218–3226.
- 10 S. Parua, R. Sikari, S. Sinha, S. Das, G. Chakraborty and N. D. Paul, *Org. Biomol. Chem.*, 2018, **16**, 274–284.
- 11 S. Das, D. Maiti and S. De Sarkar, *J. Org. Chem.*, 2018, **83**, 2309–2316.
- 12 G. Chakraborty, R. Sikari, S. Das, R. Mondal, S. Sinha, S. Banerjee and N. D. Paul, *J. Org. Chem.*, 2019, **84**, 2626–2641.
- 13 S. Das, S. Sinha, D. Samanta, R. Mondal, G. Chakraborty, P. Brandaõ and N. D. Paul, *J. Org. Chem.*, 2019, **84**, 10160–10171.
- 14 S. P. Midya, V. G. Landge, M. K. Sahoo, J. Rana and E. Balaraman, *Chem. Commun.*, 2017, **54**, 90–93.
- 15 S. Shee, K. Ganguli, K. Jana and S. Kundu, *Chem. Commun.*, 2018, **54**, 6883–6886.
- 16 A. Maji, S. Gupta, M. Maji and S. Kundu, *J. Org. Chem.*, 2022, **87**, 8351–8367.
- 17 H. Vander Mierde, P. Van Der Voort, D. De Vos and F. Verpoort, *European J. Org. Chem.*, 2008, **2008**, 1625–1631.
- 18 D. Wei, V. Dorcet, C. Darcel and J. B. Sortais, *ChemSusChem*, 2019, **12**, 3078–3082.
- 19 A. Maji, A. Singh, N. Singh and K. Ghosh, *ChemCatChem*, 2020, **12**, 3108–3125.
- 20 P. Daw, A. Kumar, N. A. Espinosa-Jalapa, Y. Diskin-Posner, Y. Ben-David and D. Milstein, *ACS Catal.*, 2018, **8**, 7734–7741.
- 21 K. Das, A. Mondal and D. Srimani, *Chem. Commun.*, 2018, **54**, 10582–10585.
- 22 A. Mondal, M. K. Sahoo, M. Subramanian and E. Balaraman, *J. Org. Chem.*, 2020, **85**, 7181–7191.
- 23 D. Panja, B. Paul, B. Balasubramaniam, R. K. Gupta and S. Kundu, *Catal. Commun.*, 2020, **137**, 105927.
- 24 S. Shee, D. Panja and S. Kundu, *J. Org. Chem.*, 2020, **85**, 2775–2784.
- 25 A. K. Bains, V. Singh and D. Adhikari, *J. Org. Chem.*, 2020, **85**, 14971–14979.
- 26 C. S. Cho and S. G. Oh, *Tetrahedron Lett.*, 2006, **47**, 5633–5636.
- 27 T. Hille, T. Irrgang and R. Kempe, *Chem. Eur. J.*, 2014, **20**, 5569–5572.
- 28 M. Mastalir, M. Glatz, E. Pittenauer, G. Allmaier and K. Kirchner, *Org. Lett.*, 2019, **21**, 1116–1120.
- 29 K. Chakrabarti, M. Maji and S. Kundu, *Green Chem.*, 2019, **21**, 1999–2004.
- 30 F. Xie, M. Zhang, H. Jiang, M. Chen, W. Lv, A. Zheng and X. Jian, *Green Chem.*, 2015, **17**, 279–284.
- 31 M. J. Climent, A. Corma, J. C. Hernández, A. B. Hungria, S. Iborra and S. Martínez-Silvestre, *J. Catal.*, 2012, **292**, 118–129.
